# Supplementary material for: Patient education on subacromial impingement syndrome
Source: Springer Nature journal article supplement (doi:10.1007/s00132-022-04294-x), 2022-08-22
Supplement: MOESM1 [file 23388848]

| Category                                                                                                                                                                                         | Points    |
|--------------------------------------------------------------------------------------------------------------------------------------------------------------------------------------------------|-----------|
| <b>Definition</b>                                                                                                                                                                                | <b>5</b>  |
| <b>Etiology / pathogenesis</b>                                                                                                                                                                   | <b>20</b> |
| Narrowness of the subacromial space                                                                                                                                                              | 5         |
| Possible causes: 1) structural; 2) functional                                                                                                                                                    | 2 each    |
| Structural bony causes:                                                                                                                                                                          | 1 each    |
| 1. Bone spurs                                                                                                                                                                                    |           |
| 2. Hooked acromial shape                                                                                                                                                                         |           |
| Different physiological variations of acromial shapes are possible                                                                                                                               | 2         |
| Types of shape variants of the acromion:                                                                                                                                                         | 1 each    |
| 1. Flat (type 1)                                                                                                                                                                                 |           |
| 2. Curved (type 2)                                                                                                                                                                               |           |
| 3. Hook-shaped (type 3)                                                                                                                                                                          |           |
| A differentiation between several types of impingement is possible (e.g. outlet / non-outlet impingement, eccentric / intrinsic impingement, posterosuperior / anterosuperior impingement, etc.) | 2         |
| Epidemiology:                                                                                                                                                                                    | 1 each    |
| - Athletes                                                                                                                                                                                       |           |
| - Occupational groups with overhead work                                                                                                                                                         |           |
| Symptoms                                                                                                                                                                                         | 15        |
| Pain caused by movement                                                                                                                                                                          | 5         |
| Radiating pain into the upper arm                                                                                                                                                                | 2         |
| Resting pain                                                                                                                                                                                     | 2         |
| Loss of movement                                                                                                                                                                                 | 2         |
| Accompanying pathologies:                                                                                                                                                                        |           |
| - Bursitis                                                                                                                                                                                       |           |
| - Rotator cuff lesion                                                                                                                                                                            |           |
| - Scapulothoracic dyskinesia                                                                                                                                                                     |           |
| - Tendinitis of the long biceps tendon                                                                                                                                                           | 1 each    |
| <b>Diagnostics</b>                                                                                                                                                                               | <b>19</b> |
| Clinical examination, ultrasound, x-ray and MRI                                                                                                                                                  | 2 each    |
| Clinical examination:                                                                                                                                                                            |           |
| - Painful arc                                                                                                                                                                                    |           |
| - Neer test                                                                                                                                                                                      |           |
| - Hawkins test                                                                                                                                                                                   |           |
| - Other tests for the supraspinatus tendon                                                                                                                                                       | je 1      |
| Ultrasound:                                                                                                                                                                                      |           |
| - Assessment of the soft tissue                                                                                                                                                                  | 2         |
| X-Ray:                                                                                                                                                                                           | 1 each    |
| - Assessment of the bony structures                                                                                                                                                              |           |
| - Assessment of the acromiohumeral distance                                                                                                                                                      |           |
| - Tendinitis calcarea                                                                                                                                                                            |           |
| MRI:                                                                                                                                                                                             | 2         |
| Assessment of the soft tissue                                                                                                                                                                    |           |
| <b>Differential diagnosis</b>                                                                                                                                                                    | <b>10</b> |
| - Capsular pathologies                                                                                                                                                                           | 2 each    |
| - Pathologies of the long biceps tendon                                                                                                                                                          |           |
| - Neurological pathologies                                                                                                                                                                       |           |
| - Pathologies of the acromioclavicular joint                                                                                                                                                     |           |
| - Osteoarthritis                                                                                                                                                                                 |           |
| <b>Therapy</b>                                                                                                                                                                                   | <b>31</b> |

|                                                                                            |            |
|--------------------------------------------------------------------------------------------|------------|
| Conservative therapy:                                                                      |            |
| - Physiotherapy                                                                            |            |
| - NSAIDs                                                                                   |            |
| - Local anasthesia                                                                         | 1 each     |
| - Cortison                                                                                 |            |
| - Avoiding painful movement                                                                |            |
| - Reducing triggering movements                                                            |            |
| - Rest                                                                                     |            |
| - Kryotherapy                                                                              |            |
| - Heat                                                                                     |            |
| - Electrotherapy                                                                           |            |
| - Shock wave                                                                               |            |
| Goals of physiotherapy:                                                                    | 1 each     |
| - Muscle strengthening                                                                     |            |
| - Widening of the joint space                                                              |            |
| - Improving posture                                                                        |            |
| - Stretching                                                                               |            |
| Indications for surgical therapy:                                                          | 1 each     |
| - If conservative therapy is unsuccessful                                                  |            |
| - In the case of relevant accompanying pathologies                                         |            |
| Surgical therapy: arthroscopic subacromial decompression / acromioplasty according to Neer | 5          |
| Surgical procedure:                                                                        | 1 each     |
| - Diagnostic arthroscopy                                                                   |            |
| - Partial bursectomy of the subactomial space                                              |            |
| - Resection of the anterior edge of the acromion or significant osteophytes                |            |
| - Treatment of accompanying pathologies                                                    |            |
| Risks of the operation:                                                                    | 1 each     |
| - Nerve lesions                                                                            |            |
| - Vascular injury                                                                          |            |
| - Stiffness                                                                                |            |
| - infection                                                                                |            |
| Postoperative Treatment:                                                                   | 1 each     |
| - Pain-adapted postoperative immobilization of the shoulder                                |            |
| - Gradual active and passive mobilization through physiotherapy                            |            |
| <b>Total score</b>                                                                         | <b>100</b> |
